# Supplementary material for: Quantifying The Leadership and Social Media Predictors of Violence and Racism during the January 6th Attack on the Capitol
Source: Research Square preprint supplement (doi:10.21203/rs.3.rs-1093923/v1), 2022-02-15
Supplement: Supplementary file 1 [file 5ce5e99d41187387efebe017.docx]

**Supplemental Information**

**Quantifying The Leadership and Social Media Predictors of Violence and Racism during the January 6th Attack on the Capital**

**Data**

Our analysis uses the following data: (1) Parler videos recorded on Jan 6th, 2021 in Washington DC; (2) Tweets originally posted by Donald Trump on Jan 6th, 2021; (3) Tweets with hashtag *#stopthesteal* originally posted on Jan 6th, 2021; and (4) the Jan 6th Washington D.C. rally speeches. All data is publicly available per the links shown in Table S1.

**Table S1: Data Sources**

| **Variable** | **Coding Procedure** | **N** | **Data Source** |
| --- | --- | --- | --- |
| Trump’s tweets | Internet download and sampled in 5-minute intervals; Processed with python toolkit. | 16 | <https://www.thetrumparchive.com/> |
| Violence level | Internet download and sampled in 5-minute intervals; Coded by crowdsourcing and manually checked by the authors to confirm crowdsourced descriptions and counts of violence; | 17 | <https://docs.google.com/spreadsheets/d/1ThPUH5HgTcVKCoyfr2oJ21AWKTGq-dR-cRZjPOER-Q0/edit#gid=0>  <https://projects.propublica.org/parler-capitol-videos/> |
| Weapons level | Internet download and sampled in 5-minute intervals; Coded by crowdsourcing and manually checked by the authors to confirm crowdsourced descriptions and counts of weapons; | 38 | <https://docs.google.com/spreadsheets/d/1ThPUH5HgTcVKCoyfr2oJ21AWKTGq-dR-cRZjPOER-Q0/edit#gid=0>  <https://projects.propublica.org/parler-capitol-videos/> |
| Racism level | Internet download and sampled in 5-minute intervals; Coded by crowdsourcing and manually checked by the authors to confirm crowdsourced descriptions and counts of acts of racism; | 29 | <https://docs.google.com/spreadsheets/d/1ThPUH5HgTcVKCoyfr2oJ21AWKTGq-dR-cRZjPOER-Q0/edit#gid=0>  <https://projects.propublica.org/parler-capitol-videos/> |
| #Stopthesteal tweets | Internet download and sampled in 5-minute intervals; These tweets were processed the same way as Trump’s tweets. | 7,550 | <https://www.c-span.org/video/?507744-1/rally-electoral-college-vote-certification> |
| Rally Speeches | Internet download and sampled in 5-minute intervals; Authors manually counted the words and measured the length of cheers | 12 | <https://www.c-span.org/video/?507744-1/rally-electoral-college-vote-certification> |

**Parler Video Data**

**Sources of Videos**: The Parler videos were uploaded and coded through a joint effort of several users and organizations, [1] which included a Twitter user (@donk_enby) [2], an Archive Team [3], and a volunteer collection of hackers and data researchers who archives the videos before Amazon Web Services stopped hosting Parler’s website. In total, these websites posted 1113 recorded videos taken on Jan 6th, 2021. 84 videos were tagged for violence, weapons, or racism through crowdsourcing. The remaining videos contained footage of protestors walking, standing, marching, shouting, talking, or vandalizing – events that can co-occur with violence but on their own are considered non- violent.

.

**Coding of Videos for Violence, Weapons, and Racism**: Coding was conducted through crowdsourcing and manual coding by the authors to insure accurate crowdsourcing coding. Step 1: Crowdsourcing coding was accomplished by an Internet Relay Chat channel [4] of users who watched and analyzed the Parler videos and coded each video on 14 dimensions, and added a unique video ID and timestamp of when the video was taken. These data were posted into a Google spreadsheet called “Notable Parler Videos.” [5]. Step 2: All coding was manually checked by the authors for accuracy in counts and descriptions. For each video, users crowdsourced the coding of the video on 14 dimensions as shown in Table 4 in the main text:

Table S2 shows how the criminal penalty for different violent acts or weapons vary according to D.C. statutes. For example, the penalty associated with “weapons” ranges from “up to $1000”. Given the fact that “firearms” were more often considered as deadly or dangerous weapons, we assign 1500 to firearms and 1000 to clubs/bats/etc. to the violence and weaponry variables. Other items (flagpoles, etc.) that are not in the list were assigned 500. For example, the weapon, “nightstick” was reported in video 6FY6c0d8IMjz (Figure S1), so the weaponry level of 1000 was assigned to this video.

**Table S2: Coding scheme for Violence and weaponry levels**

|  | **Penalty** | **violation** | **reference** |
| --- | --- | --- | --- |
| **Weapons** | up to $1000 | possession of unregistered firearm | "It is illegal to possess or sell a firearm in the Washington, DC without a valid registration certificate. The penalty for violating this section is a maximum fine of $1000 and/or a maximum of one year imprisonment." |
| up to $1000 | possession of a prohibited weapon (blackjack, sand club, switchblade, etc.) | "It is illegal to possess a whole range of “dangerous” weapons, including blackjack, sand club, switchblade, silencer or muffler, dagger, stiletto, or sawed off shotgun. It is also illegal to possess an imitation pistol, dagger, dirk, razor, stiletto or knife with a blade longer than three inches with the intent to use it unlawfully. The penalty for a first-time offender without a prior felony conviction is a maximum fine of $1000 and/or up to a year incarceration." |
| up to $1000 | unlawful possession of Ammunition | "It is also illegal to possess, sell or transfer any 'large capacity ammunition feeding device.'  A person guilty of this charge can be sentenced to a maximum fine of $1000 and/or up to a year imprisonment.  D.C. Criminal Code 7-2506.01." |
| **Violence** | up to $25000 | aggravated assault  attempted aggravated assault | "DC law states that aggravated assault occurs when a person purposefully causes serious bodily injury to another, or a person knowingly does something which creates a grave risk of serious bodily injury to another. Under circumstances that demonstrate an extreme indifference to human life"  "Aggravated assault carries the penalty of a felony conviction, a fine of no more than $25,000, up to 10 years in prison, or both. Attempted aggravated assault also carries serious penalties of a felony conviction, a fine of up to $12,500, up to five years in prison, or both." |
| up to $1000 | threats to do bodily harm | "The most minor of assault charges, Section 22-407 states that any person who threatens to do bodily harm to another person is guilty of misdemeanor assault. They face a fine of up to $1000, up to six months in jail, or both." |
| up to $1000 | assaulting an officer | "An individual convicted of assaulting an officer under these circumstances will be guilty of a misdemeanor and will face up to 180 days in jail, up to a $1,000 fine, or both." |
| up to $25000 | assaulting an officer | "By assaulting an officer and either harming the officer or creating a great risk of harm to the officer one faces much harsher penalties. This includes a felony conviction, as well as up to 10 years in prison, a $25,000 fine, or both." |

The value of violence level or weaponry level for each 5-minute interval is calculated by summing up the scores of all videos taken during that interval. The racism level was calculated as the ratio of crowdsourced votes for “racism” to total responses made by crowdsources to the video and summing up all the scores within each 5-minute interval to build the time series. The mean (standard deviation) of the variables of (i) violence level, (ii) weaponry level, and (iii) racism level is 46.875 (271.255), 116.319 (489.803), and 0.070 (0.267) respectively.

Figure S1 presents examples of the coding and operationalization of violence, weaponry, and racism variables in relation to snapshots taken from five different videos. The pie chart indicates what weapons coders to the website should tag in a video. Figure S2 shows the levels of violence, weapons, and racism for each five-minute interval starting at 9:00 to 18:00 hours.

**Figure S1: Examples of Videos coded for Violence, Weaponry and Racism**


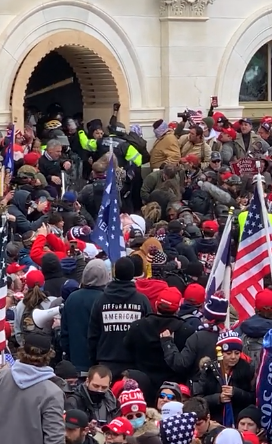

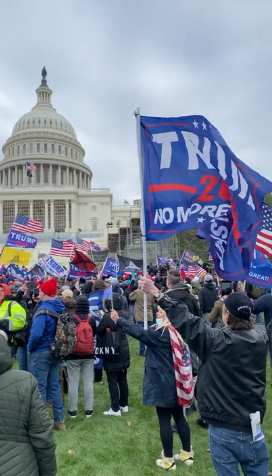
**
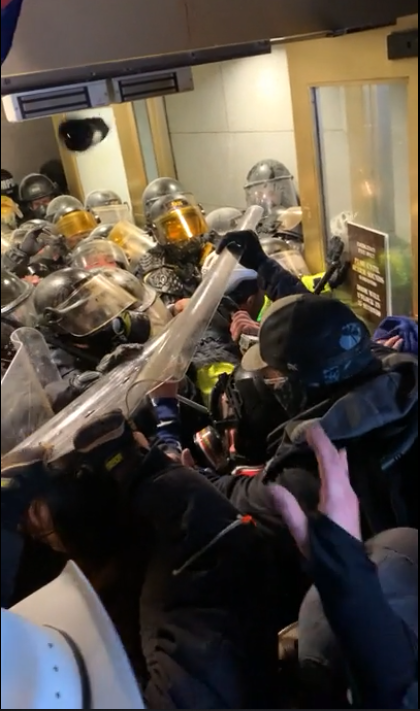
**

**Video ID:** rKv1m3cDVn8K

**Description:** “Cops being beaten by Trump 2020 Flag poles”, “The man in the brown coat and red hat in the upper left of the screen feeds a Trump flag with pole through to someone inside the portico. That person then begins to hit police and crowd members with the pole.

”, …

**Violence level:** 1000

**Total response:** 4

**Votes for “violence”:** 4


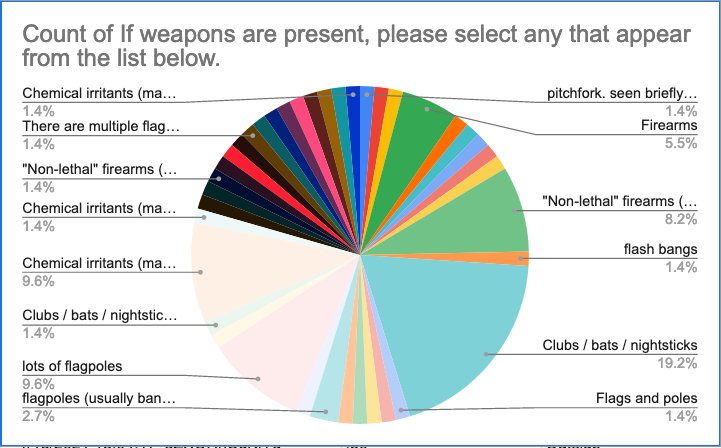


**Video ID:** Q6DY9FC1N3Rp

**Description:** “Confederate flag”

**Total response:** 3

**Votes for “racism”:** 2

**Racism level:** 2/3 = .67

**Video ID:** ZhHAD9NO8kHg

**Description:** “Rioters pushing forcefully against a wall of cops, attempting to enter the Capitol. The protesters are just outside the doors as the cops have formed a wall inside.”

**Violence:** Shoving

**Violence level:** 500

**Responses:** 1

**Votes for “violence”:** 1

**Trump Tweets Data details**

**Source of Tweets**. Twitter permanently suspended Donald Trump’s account [8] on Jan. 8th, 2021 but his complete corpus of January 6th, 2021 Tweets were archived before being removed by Twitter and posted for public download at <https://www.thetrumparchive.com/> [9].

**Coding of Tweets**. We used the sentiment analysis toolkit VADER [10] to calculate the proportion of positive and negative words in each tweet (multiplied by the total length of each tweet) in each 5-minute interval from midnight to midnight on Jan 6th, 2021 to create two time series variables “positive level of Trump’s tweets” and “negative level of Trump’s tweets” for our study.

Table S4 shows all of Trump’s tweets and their sentiment scores, number of likes and number of retweets. Furthermore, the usage of sentiment score is demonstrated in Table S3. For example, at 9:00:12 AM Trump Tweeted, “They just happened to find 50,000 ballots late last night. The USA is embarrassed by fools. Our Election Process is worse than that of third world countries!” In this tweet, the words “embarrassed,” “fools,” and “worse” are negative sentiment words, which have sentiment scores that add up to 7.425. The positive score, or the ratio for proportion of the text that fall in the positive category is 0.275, which leads to a combined positive sentiment scores 27 (total length) x 0.275 (negative ratio) = 7.425. Similarly, Trump Tweeted at 2:38:58 PM, “Please support our Capitol Police and Law Enforcement. They are truly on the side of our Country. Stay peaceful!,” where the words “Please,” “support,” “truly,” and “peaceful” have positive sentiment and a combined score of 19 (total length) x 0.432 (positive ratio) = 8.208.

**Table S3: Trump’s Tweets from Midnight to Midnight on 1/6/21**

| **Time (EST)** | **Trump’s Tweets (Five retweets of other’s tweets are omitted here because they appear in #stopthesteel tweets).** | **Negative Score** | **Neutral Score** | **positive Score** | **Number of Likes** | **Number of Retweets** |
| --- | --- | --- | --- | --- | --- | --- |
| 6:01:04 PM | These are the things and events that happen when a sacred landslide election victory is so unceremoniously &amp; viciously stripped away from great patriots who have been badly &amp; unfairly treated for so long. Go home with love &amp; in peace. Remember this day forever! | 0.098 | 0.693 | 0.209 | 0 | 0 |
| 4:17:24 PM | <https://t.co/Pm2PKV0Fp3>  (*I know your pain. I know you’re hurt. We had an election that was stolen from us. It was a landslide election, and everyone knows it, especially the other side, but you have to go home now. We have to have peace. We have to have law and order. We have to respect our great people in law and order. We don’t want anybody hurt. It’s a very tough period of time. There’s never been a time like this where such a thing happened, where they could take it away from all of us, from me, from you, from our country. This was a fraudulent election, but we can’t play into the hands of these people. We have to have peace. So go home. We love you. You’re very special. You’ve seen what happens. You see the way others are treated that are so bad and so evil. I know how you feel. But go home and go home at peace.*) | 0.141 | 0.665 | 0.194 | 0 | 0 |
| 3:13:26 PM | I am asking for everyone at the U.S. Capitol to remain peaceful. No violence! Remember, WE are the Party of Law &amp; Order – respect the Law and our great men and women in Blue. Thank you! | 0 | 0.614 | 0.386 | 730357 | 156100 |
| 2:38:58 PM | Please support our Capitol Police and Law Enforcement. They are truly on the side of our Country. Stay peaceful! | 0 | 0.568 | 0.432 | 582183 | 107460 |
| 2:24:22 PM | Mike Pence didn’t have the courage to do what should have been done to protect our Country and our Constitution, giving States a chance to certify a corrected set of facts, not the fraudulent or inaccurate ones which they were asked to previously certify. USA demands the truth! | 0 | 0.731 | 0.269 | 0 | 0 |
| 1:49:54 PM | https://t.co/izItBeFE6G | 0 | 1 | 0 | 225460 | 55188 |
| 10:44:31 AM | These scoundrels are only toying with the @sendavidperdue (a great guy) vote. Just didn’t want to announce quite yet. They’ve got as many ballots as are necessary. Rigged Election! | 0.073 | 0.76 | 0.166 | 246426 | 56883 |
| 9:16:30 AM | Even Mexico uses Voter I.D. | 0 | 1 | 0 | 458141 | 72314 |
| 9:15:07 AM | The States want to redo their votes. They found out they voted on a FRAUD. Legislatures never approved. Let them do it. BE STRONG! | 0.22 | 0.616 | 0.164 | 303347 | 69832 |
| 9:00:12 AM | They just happened to find 50,000 ballots late last night. The USA is embarrassed by fools. Our Election Process is worse than that of third world countries! | 0.275 | 0.725 | 0 | 377295 | 92437 |
| 8:22:26 AM | THE REPUBLICAN PARTY AND, MORE IMPORTANTLY, OUR COUNTRY, NEEDS THE PRESIDENCY MORE THAN EVER BEFORE - THE POWER OF THE VETO. STAY STRONG! | 0 | 0.629 | 0.371 | 344390 | 66595 |
| 8:17:22 AM | States want to correct their votes, which they now know were based on irregularities and fraud, plus corrupt process never received legislative approval. All Mike Pence has to do is send them back to the States, AND WE WIN. Do it Mike, this is a time for extreme courage! | 0.106 | 0.734 | 0.16 | 251729 | 62503 |
| 8:06:45 AM | Sleepy Eyes Chuck Todd is so happy with the fake voter tabulation process that he can’t even get the words out straight. Sad to watch! | 0.182 | 0.615 | 0.203 | 193930 | 36209 |
| 1:00:50 AM | If Vice President @Mike_Pence comes through for us, we will win the Presidency. Many States want to decertify the mistake they made in certifying incorrect &amp; even fraudulent numbers in a process NOT approved by their State Legislatures (which it must be). Mike can send it back! | 0.149 | 0.759 | 0.092 | 289835 | 66961 |
| 12:43:42 AM | Get smart Republicans. FIGHT! https://t.co/3fs1oPVnAx | 0.389 | 0.322 | 0.29 | 127234 | 26083 |
| 12:08:24 AM | Just happened to have found another 4000 ballots from Fulton County. Here we go! | 0 | 1 | 0 | 306738 | 69530 |
| Row of means |  | 0.289 | 0.102 | 0.714 | 277317 | 58631 |

**Robustness Checks: Granger causality and violence coding scheme**

**Granger Causality Analysis with the MVGC Multivariate Granger Causality Matlab® Toolbox.** To test whether the Granger causality effects reported by the STATA Granger algorithm are method dependent, we ran Granger causality analyses with MVGC Multivariate Granger Causality Matlab Toolbox [13], which conducts numerical computation and statistical inference of Granger causality, conditional and unconditional, in both time and frequency domains. Although the *p*-values from the two different approaches may vary, the Granger causal connectivity agree to each other.

A comparison of the two Granger models return the same stable Granger connections except that in MVGC Matlab Toolbox, the link “#sts_tweets_pos by weaponrylevel” is insignificant when lag=2.

**Table S4:** **Granger causality tests with MVGC Matlab® Toolbox:**

| **Significant?** | **variables** | **lag=1 (5min)** | **lag=2 (10min)** |
| --- | --- | --- | --- |
|  | violencelevel by weaponrylevel | 0.675 | 0.246 |
|  | violencelevel by racistlevel | 0.34 | 0.405 |
| **Yes** | violencelevel by trump_tweets_pos | 0 | 0 |
|  | violencelevel by trump_tweets_neg | 0.012 | 0.055 |
| **Yes** | violencelevel by cheer_length_trump | 0 | 0 |
|  | violencelevel by cheer_length_warmup | 0.924 | 0.996 |
|  | violencelevel by #sts_tweets_pos | 0.06 | 0.535 |
|  | violencelevel by #sts_tweets_neg | 0.995 | 0.193 |
|  | weaponrylevel by violencelevel | 0.221 | 0.3 |
| **Yes** | weaponrylevel by racistlevel | 0 | 0 |
| **Yes** | weaponrylevel by trump_tweets_pos | 0.974 | 0.001 |
|  | weaponrylevel by trump_tweets_neg | 0.882 | 0.142 |
| **Yes** | weaponrylevel by cheer_length_trump | 0 | 0 |
|  | weaponrylevel by cheer_length_warmup | 0.906 | 0.841 |
|  | weaponrylevel by #sts_tweets_pos | 0.844 | 0.086 |
|  | weaponrylevel by #sts_tweets_neg | 0.003 | 0.003 |
|  | racistlevel by violencelevel | 0.926 | 0.657 |
| **Yes** | racistlevel by weaponrylevel | 0 | 0 |
|  | racistlevel by trump_tweets_pos | 0.624 | 0.976 |
|  | racistlevel by trump_tweets_neg | 0.576 | 0.828 |
|  | racistlevel by cheer_length_trump | 0.808 | 0.071 |
|  | racistlevel by cheer_length_warmup | 0.81 | 0.946 |
|  | racistlevel by #sts_tweets_pos | 0.781 | 0.343 |
|  | racistlevel by #sts_tweets_neg | 0.108 | 0.592 |
|  | trump_tweets_pos by violencelevel | 0.099 | 0.173 |
|  | trump_tweets_pos by weaponrylevel | 0.111 | 0.323 |
|  | trump_tweets_pos by racistlevel | 0.041 | 0.044 |
|  | trump_tweets_pos by trump_tweets_neg | 0.308 | 0.424 |
|  | trump_tweets_pos by cheer_length_trump | 0.727 | 0.884 |
|  | trump_tweets_pos by cheer_length_warmup | 0.551 | 0.485 |
|  | trump_tweets_pos by #sts_tweets_pos | 0.004 | 0.034 |
|  | trump_tweets_pos by #sts_tweets_neg | 0.292 | 0.154 |
|  | trump_tweets_neg by violencelevel | 0.834 | 0.877 |
|  | trump_tweets_neg by weaponrylevel | 0.837 | 0.905 |
|  | trump_tweets_neg by racistlevel | 0.696 | 0.805 |
|  | trump_tweets_neg by trump_tweets_pos | 0.906 | 0.765 |
|  | trump_tweets_neg by cheer_length_trump | 0.836 | 0.963 |
|  | trump_tweets_neg by cheer_length_warmup | 0.757 | 0.81 |
|  | trump_tweets_neg by #sts_tweets_pos | 0.203 | 0.386 |
|  | trump_tweets_neg by #sts_tweets_neg | 0.106 | 0.239 |
|  | cheer_length_trump by violencelevel | 0.768 | 0.868 |
|  | cheer_length_trump by weaponrylevel | 0.981 | 0.947 |
|  | cheer_length_trump by racistlevel | 0.553 | 0.81 |
|  | cheer_length_trump by trump_tweets_pos | 0.89 | 0.956 |
|  | cheer_length_trump by trump_tweets_neg | 0.906 | 0.982 |
|  | cheer_length_trump by cheer_length_warmup | 0.936 | 0.986 |
|  | cheer_length_trump by #sts_tweets_pos | 0.211 | 0.298 |
|  | cheer_length_trump by #sts_tweets_neg | 0.769 | 0.718 |
|  | cheer_length_warmup by violencelevel | 0.884 | 0.905 |
|  | cheer_length_warmup by weaponrylevel | 0.937 | 0.841 |
|  | cheer_length_warmup by racistlevel | 0.884 | 0.951 |
|  | cheer_length_warmup by trump_tweets_pos | 0.875 | 0.975 |
|  | cheer_length_warmup by trump_tweets_neg | 0.554 | 0.715 |
|  | cheer_length_warmup by cheer_length_trump | 0.869 | 0.963 |
|  | cheer_length_warmup by #sts_tweets_pos | 0.257 | 0.319 |
|  | cheer_length_warmup by #sts_tweets_neg | 0.214 | 0.222 |
|  | #sts_tweets_pos by violencelevel | 0.161 | 0.119 |
| **NO** | #sts_tweets_pos by weaponrylevel | 0.719 | 0.099 |
|  | #sts_tweets_pos by racistlevel | 0.282 | 0.234 |
|  | #sts_tweets_pos by trump_tweets_pos | 0.706 | 0.449 |
|  | #sts_tweets_pos by trump_tweets_neg | 0.491 | 0.811 |
|  | #sts_tweets_pos by cheer_length_trump | 0.261 | 0.522 |
|  | #sts_tweets_pos by cheer_length_warmup | 0.839 | 0.344 |
|  | #sts_tweets_pos by #sts_tweets_neg | 0 | 0.003 |
|  | #sts_tweets_neg by violencelevel | 0.886 | 0.089 |
|  | #sts_tweets_neg by weaponrylevel | 0.21 | 0.469 |
|  | #sts_tweets_neg by racistlevel | 0.181 | 0.074 |
| **Yes** | #sts_tweets_neg by trump_tweets_pos | 0.013 | 0.004 |
|  | #sts_tweets_neg by trump_tweets_neg | 0.089 | 0.206 |
|  | #sts_tweets_neg by cheer_length_trump | 0.302 | 0.488 |
|  | #sts_tweets_neg by cheer_length_warmup | 0.553 | 0.4 |
|  | #sts_tweets_neg by #sts_tweets_pos | 0.01 | 0.031 |

**Table S5. Robustness Check: Alternative coding scheme for violence level**

| **Violence coding based on TV violence scale45** | **Violence coding based on D.C. criminal code44** |
| --- | --- |
| 1 = shooting | 6 = shooting |
| 3 = fist-fighting, pushing, striking | 4 = pushing |
| 4 = hitting with weapons/tools/knockout | 3 = beating |
| 6 = poisoning | 1 = releasing smoke or tear gas |

We ran Granger Causality tests with the following 4 combination of coding schemes. The results were confirmatory and the full regression tables are in Table :

A. original *violencelevel*, original *weaponrylevel,* and all the other variables.

B. original *violencelevel*, alternative *weaponrylevel,* and all the other variables.

C. alternative *violencelevel*, original *weaponrylevel,* and all the other variables.

D. alternative *violencelevel*, alternative *weaponrylevel,* and all the other variables.

**Granger Causality tests with different coding schemes.**

| **Coding scheme** | | **A** | | **B** | | **C** | | **D** | |
| --- | --- | --- | --- | --- | --- | --- | --- | --- | --- |
| stable? | variables | lag=1 (5min) | lag=2 (10min) | lag=1 (5min) | lag=2 (10min) | lag=1 (5min) | lag=2 (10min) | lag=1 (5min) | lag=2 (10min) |
|  | violencelevel by weaponrylevel | 0.637 | 0.15 | 0.996 | 0.311 | 0.637 | 0.15 | 0.996 | 0.311 |
|  | violencelevel by racismlevel | 0.301 | 0.343 | 0.385 | 0.474 | 0.301 | 0.343 | 0.385 | 0.474 |
| Yes | violencelevel by trump_tweets_pos | 0 | 0 | 0 | 0 | 0 | 0 | 0 | 0 |
| Yes | violencelevel by trump_tweets_neg | 0.01 | 0.042 | 0.009 | 0.041 | 0.01 | 0.042 | 0.009 | 0.041 |
| Yes | violencelevel by cheer_length_trump | 0 | 0 | 0 | 0 | 0 | 0 | 0 | 0 |
|  | violencelevel by cheer_length_warmup | 0.922 | 0.995 | 0.924 | 0.995 | 0.922 | 0.995 | 0.924 | 0.995 |
|  | violencelevel by #sts_tweets_pos | 0.045 | 0.503 | 0.036 | 0.416 | 0.045 | 0.503 | 0.036 | 0.416 |
|  | violencelevel by #sts_tweets_neg | 0.995 | 0.128 | 0.91 | 0.155 | 0.995 | 0.128 | 0.91 | 0.155 |
|  | weaponrylevel by violencelevel | 0.164 | 0.179 | 0.515 | 0.346 | 0.164 | 0.179 | 0.515 | 0.346 |
| Yes | weaponrylevel by racismlevel | 0 | 0 | 0 | 0 | 0 | 0 | 0 | 0 |
|  | weaponrylevel by trump_tweets_pos | 0.973 | 0 | 0.786 | 0 | 0.973 | 0 | 0.786 | 0 |
|  | weaponrylevel by trump_tweets_neg | 0.879 | 0.117 | 0.836 | 0.084 | 0.879 | 0.117 | 0.836 | 0.084 |
| Yes | weaponrylevel by cheer_length_trump | 0 | 0 | 0 | 0 | 0 | 0 | 0 | 0 |
|  | weaponrylevel by cheer_length_warmup | 0.905 | 0.827 | 0.929 | 0.991 | 0.905 | 0.827 | 0.929 | 0.991 |
|  | weaponrylevel by #sts_tweets_pos | 0.834 | 0.055 | 0.738 | 0.025 | 0.834 | 0.055 | 0.738 | 0.025 |
| Yes | weaponrylevel by #sts_tweets_neg | 0.001 | 0 | 0.001 | 0 | 0.001 | 0 | 0.001 | 0 |
|  | racismlevel by violencelevel | 0.91 | 0.576 | 0.813 | 0.726 | 0.91 | 0.576 | 0.813 | 0.726 |
| Yes | racismlevel by weaponrylevel | 0 | 0 | 0 | 0 | 0 | 0 | 0 | 0 |
|  | racismlevel by trump_tweets_pos | 0.605 | 0.974 | 0.536 | 0.949 | 0.605 | 0.974 | 0.536 | 0.949 |
|  | racismlevel by trump_tweets_neg | 0.567 | 0.816 | 0.566 | 0.824 | 0.567 | 0.816 | 0.566 | 0.824 |
|  | racismlevel by cheer_length_trump | 0.804 | 0.056 | 0.8 | 0.061 | 0.804 | 0.056 | 0.8 | 0.061 |
|  | racismlevel by cheer_length_warmup | 0.807 | 0.942 | 0.816 | 0.946 | 0.807 | 0.942 | 0.816 | 0.946 |
|  | racismlevel by #sts_tweets_pos | 0.769 | 0.285 | 0.825 | 0.303 | 0.769 | 0.285 | 0.825 | 0.303 |
|  | racismlevel by #sts_tweets_neg | 0.075 | 0.522 | 0.048 | 0.393 | 0.075 | 0.522 | 0.048 | 0.393 |
|  | trump_tweets_pos by violencelevel | 0.06 | 0.092 | 0.05 | 0.079 | 0.06 | 0.092 | 0.05 | 0.079 |
|  | trump_tweets_pos by weaponrylevel | 0.072 | 0.228 | 0.052 | 0.145 | 0.072 | 0.228 | 0.052 | 0.145 |
| Yes | trump_tweets_pos by racismlevel | 0.026 | 0.023 | 0.023 | 0.013 | 0.026 | 0.023 | 0.023 | 0.013 |
|  | trump_tweets_pos by trump_tweets_neg | 0.296 | 0.398 | 0.3 | 0.409 | 0.296 | 0.398 | 0.3 | 0.409 |
|  | trump_tweets_pos by cheer_length_trump | 0.721 | 0.876 | 0.719 | 0.87 | 0.721 | 0.876 | 0.719 | 0.87 |
|  | trump_tweets_pos by cheer_length_warmup | 0.543 | 0.455 | 0.546 | 0.454 | 0.543 | 0.455 | 0.546 | 0.454 |
| Yes | trump_tweets_pos by #sts_tweets_pos | 0.002 | 0.024 | 0.002 | 0.018 | 0.002 | 0.024 | 0.002 | 0.018 |
|  | trump_tweets_pos by #sts_tweets_neg | 0.245 | 0.11 | 0.252 | 0.128 | 0.245 | 0.11 | 0.252 | 0.128 |
|  | trump_tweets_neg by violencelevel | 0.813 | 0.85 | 0.822 | 0.85 | 0.813 | 0.85 | 0.822 | 0.85 |
|  | trump_tweets_neg by weaponrylevel | 0.817 | 0.878 | 0.832 | 0.883 | 0.817 | 0.878 | 0.832 | 0.883 |
|  | trump_tweets_neg by racismlevel | 0.673 | 0.764 | 0.678 | 0.761 | 0.673 | 0.764 | 0.678 | 0.761 |
|  | trump_tweets_neg by trump_tweets_pos | 0.901 | 0.73 | 0.904 | 0.735 | 0.901 | 0.73 | 0.904 | 0.735 |
|  | trump_tweets_neg by cheer_length_trump | 0.832 | 0.96 | 0.832 | 0.96 | 0.832 | 0.96 | 0.832 | 0.96 |
|  | trump_tweets_neg by cheer_length_warmup | 0.752 | 0.796 | 0.753 | 0.796 | 0.752 | 0.796 | 0.753 | 0.796 |
|  | trump_tweets_neg by #sts_tweets_pos | 0.176 | 0.351 | 0.177 | 0.352 | 0.176 | 0.351 | 0.177 | 0.352 |
|  | trump_tweets_neg by #sts_tweets_neg | 0.074 | 0.178 | 0.074 | 0.179 | 0.074 | 0.178 | 0.074 | 0.179 |
|  | cheer_length_trump by violencelevel | 0.738 | 0.84 | 0.72 | 0.822 | 0.738 | 0.84 | 0.72 | 0.822 |
|  | cheer_length_trump by weaponrylevel | 0.979 | 0.93 | 0.947 | 0.906 | 0.979 | 0.93 | 0.947 | 0.906 |
|  | cheer_length_trump by racismlevel | 0.521 | 0.777 | 0.512 | 0.758 | 0.521 | 0.777 | 0.512 | 0.758 |
|  | cheer_length_trump by trump_tweets_pos | 0.884 | 0.951 | 0.887 | 0.952 | 0.884 | 0.951 | 0.887 | 0.952 |
|  | cheer_length_trump by trump_tweets_neg | 0.903 | 0.981 | 0.902 | 0.98 | 0.903 | 0.981 | 0.902 | 0.98 |
|  | cheer_length_trump by cheer_length_warmup | 0.934 | 0.985 | 0.935 | 0.985 | 0.934 | 0.985 | 0.935 | 0.985 |
|  | cheer_length_trump by #sts_tweets_pos | 0.184 | 0.264 | 0.181 | 0.255 | 0.184 | 0.264 | 0.181 | 0.255 |
|  | cheer_length_trump by #sts_tweets_neg | 0.746 | 0.649 | 0.738 | 0.637 | 0.746 | 0.649 | 0.738 | 0.637 |
|  | cheer_length_warmup by violencelevel | 0.869 | 0.887 | 0.868 | 0.883 | 0.869 | 0.887 | 0.868 | 0.883 |
|  | cheer_length_warmup by weaponrylevel | 0.93 | 0.798 | 0.929 | 0.771 | 0.93 | 0.798 | 0.929 | 0.771 |
|  | cheer_length_warmup by racismlevel | 0.875 | 0.941 | 0.875 | 0.932 | 0.875 | 0.941 | 0.875 | 0.932 |
|  | cheer_length_warmup by trump_tweets_pos | 0.869 | 0.971 | 0.871 | 0.974 | 0.869 | 0.971 | 0.871 | 0.974 |
|  | cheer_length_warmup by trump_tweets_neg | 0.544 | 0.698 | 0.544 | 0.694 | 0.544 | 0.698 | 0.544 | 0.694 |
|  | cheer_length_warmup by cheer_length_trump | 0.866 | 0.96 | 0.866 | 0.957 | 0.866 | 0.96 | 0.866 | 0.957 |
|  | cheer_length_warmup by #sts_tweets_pos | 0.229 | 0.285 | 0.229 | 0.281 | 0.229 | 0.285 | 0.229 | 0.281 |
|  | cheer_length_warmup by #sts_tweets_neg | 0.17 | 0.14 | 0.168 | 0.135 | 0.17 | 0.14 | 0.168 | 0.135 |
|  | #sts_tweets_pos by violencelevel | 0.111 | 0.062 | 0.104 | 0.051 | 0.111 | 0.062 | 0.104 | 0.051 |
|  | #sts_tweets_pos by weaponrylevel | 0.686 | 0.027 | 0.65 | 0.015 | 0.686 | 0.027 | 0.65 | 0.015 |
|  | #sts_tweets_pos by racismlevel | 0.243 | 0.178 | 0.249 | 0.183 | 0.243 | 0.178 | 0.249 | 0.183 |
|  | #sts_tweets_pos by trump_tweets_pos | 0.69 | 0.385 | 0.701 | 0.437 | 0.69 | 0.385 | 0.701 | 0.437 |
|  | #sts_tweets_pos by trump_tweets_neg | 0.481 | 0.799 | 0.482 | 0.806 | 0.481 | 0.799 | 0.482 | 0.806 |
|  | #sts_tweets_pos by cheer_length_trump | 0.25 | 0.498 | 0.249 | 0.526 | 0.25 | 0.498 | 0.249 | 0.526 |
|  | #sts_tweets_pos by cheer_length_warmup | 0.836 | 0.312 | 0.835 | 0.308 | 0.836 | 0.312 | 0.835 | 0.308 |
| Yes | #sts_tweets_pos by #sts_tweets_neg | 0 | 0.001 | 0 | 0.001 | 0 | 0.001 | 0 | 0.001 |
|  | #sts_tweets_neg by violencelevel | 0.872 | 0.036 | 0.866 | 0.048 | 0.872 | 0.036 | 0.866 | 0.048 |
|  | #sts_tweets_neg by weaponrylevel | 0.158 | 0.327 | 0.148 | 0.432 | 0.158 | 0.327 | 0.148 | 0.432 |
|  | #sts_tweets_neg by racismlevel | 0.147 | 0.041 | 0.145 | 0.043 | 0.147 | 0.041 | 0.145 | 0.043 |
| Yes | #sts_tweets_neg by trump_tweets_pos | 0.008 | 0.002 | 0.007 | 0.002 | 0.008 | 0.002 | 0.007 | 0.002 |
|  | #sts_tweets_neg by trump_tweets_neg | 0.081 | 0.182 | 0.08 | 0.184 | 0.081 | 0.182 | 0.08 | 0.184 |
|  | #sts_tweets_neg by cheer_length_trump | 0.291 | 0.462 | 0.291 | 0.464 | 0.291 | 0.462 | 0.291 | 0.464 |
|  | #sts_tweets_neg by cheer_length_warmup | 0.545 | 0.369 | 0.547 | 0.371 | 0.545 | 0.369 | 0.547 | 0.371 |
| Yes | #sts_tweets_neg by #sts_tweets_pos | 0.006 | 0.019 | 0.006 | 0.016 | 0.006 | 0.019 | 0.006 | 0.016 |

**References**

[1] The Hacker Who Archived Parler Explains How She Did It (and What Comes Next), <https://www.vice.com/en/article/n7vqew/the-hacker-who-archived-parler-explains-how-she-did-it-and-what-comes-next>

[2] Twitter user @donk_enby <https://twitter.com/donk_enby?lang=en>

[3] Twitter user Archive Team <https://twitter.com/archiveteam?lang=en>

[4] IRC Channels: #parlerparsers at <https://webirc.hackint.org/>

[5] Google spreadsheet, Notable Parler Videos, <https://docs.google.com/spreadsheets/d/1ThPUH5HgTcVKCoyfr2oJ21AWKTGq-dR-cRZjPOER-Q0/edit#gid=0>

[6] Penalty on firearms/weapons <https://koehlerlaw.net/criminal-defense-dc/weapons/>

[7] DC Assault Laws <https://criminallawdc.com/dc-assault-lawyer/laws/>

[8] Twitter Inc., Permanent suspension of @realDonaldTrump, Jan. 8th, 2021, <https://blog.twitter.com/en_us/topics/company/2020/suspension.html>

[9] Trump Twitter Archive, <https://www.thetrumparchive.com/>

[10] Hutto, C.J. & Gilbert, E.E. (2014). VADER: A Parsimonious Rule-based Model for Sentiment Analysis of Social Media Text. Eighth International Conference on Weblogs and Social Media (ICWSM-14). Ann Arbor, MI, June 2014.

[11] Historical tweets with hashtag #stopthesteal <https://twitter.com/search?q=%23StopTheSteal%20since%3A2021-01-06%20until%3A2021-01-08%20-filter%3Areplies&src=typed_query>

[12] snscrape, a Python toolkits of scraping historical tweets, <https://pypi.org/project/snscrape/#description>

[13] L. Barnett and A. K. Seth, The MVGC Multivariate Granger Causality Toolbox: A New Approach to Granger-causal Inference, J. Neurosci. Methods 223, 2014.

[14] Mustonen A, Pulkkinen L. Television violence: A development of a coding scheme[J]. Journal of Broadcasting & Electronic Media, 1997, 41(2): 168-189.
